# Supplementary material
Source: Springer Nature journal article supplement (https://www.springermedizin.de/resource/supplementary/12974_2010_303_MOESM3_ESM.pdf/9601208)

## MVN

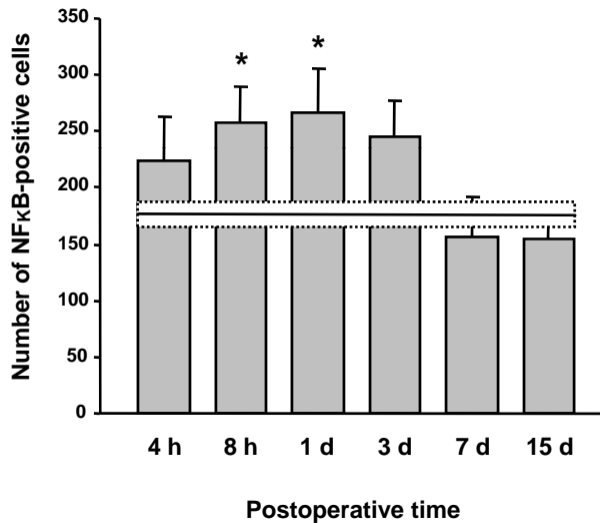

## IVN

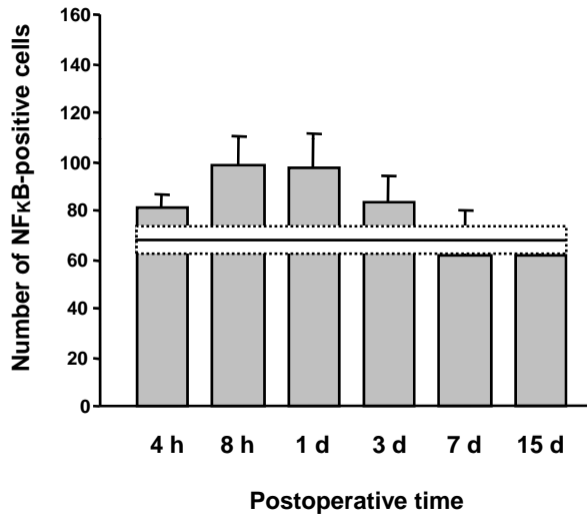

Supplement: MOESM3 [file 9601208]
